# Supplementary material for: Influence of Vitamin D on the Vasoactive Effect of Estradiol in a Rat Model of Polycystic Ovary Syndrome
Source: MDPI journal article supplement (doi:10.3390/ijms22179404), 2021-08-30
Supplement: s1 [file s1]

Figure S1. Estradiol dependent vasorelaxation

| T-D+      |          |         | T+D+       |          |         |
|-----------|----------|---------|------------|----------|---------|
| 0.0000001 | 0.000001 | 0.00001 | 0.0000001  | 0.000001 | 0.00001 |
| 0.750     | 5.990    | 2.890   | 43.630     | 48.380   | 49.210  |
| 54.01     | 27.360   | 11.400  | 27.940     | 29.160   | 25.010  |
| 11.610    | 30.670   | 25.610  | 36.530     | 44.380   | 47.230  |
| 8.480     | 11.110   | 7.440   | 16.590     | 17.630   | 15.390  |
| 13.380    | 16.500   | 19.990  | 32.720     | 32.270   | 29.630  |
| 11.550    | 18.620   | 17.450  | 16.710     | 18.330   | 18.330  |
| 48.650    | 46.640   | 42.980  | 31.580     | 36.720   | 40.250  |
| 27.320    | 35.970   | 38.490  | 41.860     | 51.470   | 55.810  |
| 11.370    | 14.880   | 13.490  | 21.920     | 28.560   | 34.690  |
| 6.760     | 14.110   | 24.000  | 29.600     | 46.210   | 52.380  |
| 7.570     | 10.950   | 14.330  | 37.190     | 47.670   | 48.130  |
| 20.590    | 28.680   | 34.190  | 14.950     | 23.850   | 24.020  |
| 4.440     | 0.890    | -5.420  | 23.160     | 30.010   | 31.120  |
| 14.230    | 15.360   | 14.230  | 26.370     | 36.550   | 45.620  |
| 26.970    | 44.980   | 72.340  | 27.020     | 34.350   | 38.180  |
| 31.550    | 48.730   | 57.930  | 41.340     | 40.180   | 42.380  |
| 40.480    | 57.140   | 66.330  | 35.060     | 46.740   | 49.250  |
| 19.200    | 34.410   | 52.560  | 25.460     | 36.130   | 40.190  |
| 28.260    | 36.740   | 38.040  | 32.440     | 46.370   | 49.880  |
| 22.140    | 32.140   | 40.320  | 30.660     | 44.140   | 51.730  |
| 30.830    | 41.600   | 50.630  | 13.820     | 23.530   | 35.150  |
| 16.580    | 21.920   | 23.250  | 37.790     | 46.140   | 55.560  |
| 10.810    | 16.870   | 20.820  | 21.120     | 24.300   | 23.420  |
| 16.970    | 24.860   | 28.880  | 8.9608.960 | 11.880   | 15.400  |
| 13.620    | 19.900   | 26.930  | 27.240     | 35.750   | 45.530  |
| 8.270     | 11.500   | 25.370  | 1.8301.830 | 5.930    | 26.770  |
| 12.830    | 20.130   | 32.080  | 0.7500.750 | -0.480   | -0.480  |
| 21.030    | 38.530   | 37.650  | 9.3709.370 | 19.850   | 29.970  |

|                                               |           |          |         |      |            |          |         |
|-----------------------------------------------|-----------|----------|---------|------|------------|----------|---------|
|                                               | 22.760    | 32.140   | 40.240  |      | 17.420     | 23.970   | 36.050  |
| Figure S1. Estradiol dependent vasorelaxation |           |          |         |      |            |          |         |
| T-D+                                          |           |          |         | T+D+ |            |          |         |
|                                               | 0.0000001 | 0.000001 | 0.00001 |      | 0.0000001  | 0.000001 | 0.00001 |
|                                               | 17.260    | 19.350   | -1.490  |      | 6.9606.960 | 21.380   | 42.630  |
|                                               | 10.030    | 16.740   | 26.310  |      | 9.4409.440 | 19.980   | 39.670  |
|                                               | 17.120    | 23.890   | 25.990  |      |            |          |         |
|                                               | 6.090     | 9.100    | 6.810   |      |            |          |         |

Figure S1. Estradiol dependent vasorelaxation

T-D-

|           |          |         |
|-----------|----------|---------|
| 0.0000001 | 0.000001 | 0.00001 |
| 2.670     | 5.450    | 5.870   |
| 3.370     | 5.050    | 6.150   |
| 4.290     | 5.490    | 3.570   |
| 2.500     | 1.190    | -3.140  |
| -0.080    | -3.710   | -0.770  |
| 1.240     | 1.460    | -16.440 |
| 2.610     | -1.550   | -4.230  |
| 6.350     | 8.870    | 12.060  |
| 3.150     | 2.310    | 2.240   |
| 2.390     | -4.310   | -13.410 |
| 4.260     | 0.410    | -1.540  |
| 9.780     | 12.660   | 11.810  |
| 14.830    | 17.880   | 22.760  |
| 26.100    | 34.130   | 42.500  |
| 19.020    | 37.490   | 66.760  |
| -1.030    | 9.090    | 21.630  |
| 22.960    | 36.340   | 41.170  |
| 20.290    | 14.910   | 25.350  |
| 14.780    | 25.190   | 46.560  |
| 9.700     | 11.400   | 6.870   |
| 35.090    | 48.850   | 54.430  |
| 35.720    | 48.230   | 52.050  |
| 17.420    | 21.870   | 24.390  |
| 5.540     | 10.360   | 13.360  |
| 11.570    | 15.760   | 22.540  |
| 15.850    | 28.560   | 35.880  |

|        |        |        |
|--------|--------|--------|
| 21.210 | 28.260 | 47.240 |
| 20.530 | 29.460 | 33.570 |
| 14.220 | 19.990 | 26.170 |

Figure S1. Estradiol dependent vasorelaxation

T-D-

|           |          |         |
|-----------|----------|---------|
| 0.0000001 | 0.000001 | 0.00001 |
| 25.120    | 35.910   | 39.980  |
| 19.210    | 33.700   | 30.660  |
| 9.570     | 7.370    | 4.100   |
| 4.670     | -15.540  | -29.440 |
| 15.790    | 22.510   | 22.340  |
| 7.530     | 9.260    | 12.100  |
| 6.340     | 7.430    | 8.810   |
| 5.770     | 10.860   | 12.940  |
| 15.830    | 25.470   | 37.970  |
| 2.900     | 1.320    | -2.770  |
| 6.450     | -0.410   | -14.650 |
| 9.690     | 10.080   | 9.330   |
| 27.760    | 42.510   | 62.040  |

Figure S1. Estradiol dependent vasorelaxation

T+D-

|           |          |         |
|-----------|----------|---------|
| 0.0000001 | 0.000001 | 0.00001 |
| 12.580    | 14.650   | 13.150  |
| 11.170    | 14.630   | 12.520  |
| 27.060    | 36.970   | 45.240  |
| 17.130    | 27.160   | 34.600  |
| 10.250    | 15.150   | 14.750  |
| 16.610    | 25.190   | 28.650  |
| 24.380    | 26.990   | 29.850  |
| 17.370    | 20.870   | 23.590  |
| 20.320    | 22.940   | 22.460  |
| 21.400    | 22.560   | 20.320  |
| 6.900     | 9.560    | 9.130   |
| 14.940    | 17.640   | 18.340  |
| 11.990    | 11.240   | 22.540  |
| 18.750    | 21.710   | 19.990  |
| 16.270    | 21.760   | 54.710  |
| 5.040     | 2.020    | 7.350   |
| 5.020     | 1.870    | 1.280   |
| 0.860     | -4.700   | -9.470  |
| 8.450     | 15.850   | 10.710  |
| 6.640     | 3.330    | 2.760   |
| 10.490    | 11.000   | 4.370   |
| 5.570     | 3.590    | -1.300  |
| 13.970    | 23.560   | 21.650  |
| 27.500    | 38.660   | 39.640  |

|        |        |        |
|--------|--------|--------|
| 3.970  | 4.710  | 5.410  |
| 39.600 | 37.650 | 49.020 |
| 12.220 | 17.640 | 17.670 |
| 23.380 | 24.890 | 22.050 |
| 16.160 | 26.470 | 26.470 |

Figure S1. Estradiol dependent vasorelaxation

T+D-

|           |          |         |
|-----------|----------|---------|
| 0.0000001 | 0.000001 | 0.00001 |
| 13.220    | 21.640   | 21.640  |
| 7.600     | 10.200   | 5.420   |
| 7.340     | 8.810    | 8.710   |
| 16.980    | 27.100   | 26.770  |
| 14.240    | 21.230   | 18.070  |
| 10.080    | 11.130   | 11.130  |
| 15.450    | 15.450   | 10.550  |
| 25.290    | 21.780   | 17.420  |
| 16.970    | 26.210   | 31.860  |
| 30.490    | 30.880   | 25.040  |

**Figure S2. Estradiol-induced vasorelaxation in the presence of eNOS (L-NAME) or COX-2 (NS398) inhibitors.**

**Panel (a):** T-D+ group

without inhibition

|           |          |         |  | L-NAME       |          |         |
|-----------|----------|---------|--|--------------|----------|---------|
| 0.0000001 | 0.000001 | 0.00001 |  | 0.0000001    | 0.000001 | 0.00001 |
| 36.52     | 34.58    | 27.17   |  | 0.120.120.12 | -8.11    | -13.33  |
| 8.99      | -3.87    | -19.02  |  | 1.731.731.73 | -6.22    | -18.37  |
| 15.65     | 18.86    | 10.5    |  | 7.497.497.49 | 10.99    | 11.97   |
| 17.35     | 18.3     | 19.24   |  | 3.623.623.62 | -0.79    | -0.13   |
| 24.48     | 28.62    | 28.62   |  | 1.681.681.68 | -7.3     | -25.48  |
| 15.63     | 25.22    | 33.73   |  | 2.822.822.82 | 0.17     | 8.97    |
| 7.55      | -0.37    | -14.92  |  | 11.6811.68   | 12.4     | 15.36   |
| 25.73     | 34.11    | 39.38   |  | 0.4600       | -4.79    | -9.58   |
| 7.75      | 6.14     | 16.12   |  |              |          |         |
| 16.54     | 23.31    | 32.71   |  |              |          |         |
| 24.78     | 24.34    | 50.88   |  |              |          |         |
| 8.2       | 4.04     | 35.01   |  |              |          |         |
| 2.15      | 0.21     | 0.35    |  |              |          |         |

**Figure S2. Estradiol-induced vasorelaxation in the presence of eNOS (L-NAME) or COX-2 (NS398) inhibitors.**

**Panel (b):** T+D+ group

without inhibition

|           |          |         |  | L-NAME    |          |         |
|-----------|----------|---------|--|-----------|----------|---------|
| 0.0000001 | 0.000001 | 0.00001 |  | 0.0000001 | 0.000001 | 0.00001 |
| 51.44     | 44.13    | 22.03   |  | 15.25     | 9.24     | -1.59   |
| 32.02     | 35.08    | 35.92   |  | 11.13     | 9.29     | 6.33    |
| 24.8      | 82.38    | -1.43   |  | 10.59     | 13.79    | 15.77   |

|       |        |        |      |        |        |
|-------|--------|--------|------|--------|--------|
| 74.29 | 74.9   | 72.24  | 3.39 | 0      | -5.74  |
| 87.65 | 95.06  | -6.17  | 6.22 | -13.87 | -29.71 |
| -1.13 | -12.39 | -30.52 | 1.94 | -11.56 | -2.66  |
| 30.3  | 33.61  | 35.26  | 5.17 | 6.89   | 34.85  |
| 23.13 | 40.36  | 36.96  |      |        |        |
| 18.69 | 26.69  | 24.23  |      |        |        |
| 26.92 | 36.86  | 41.67  |      |        |        |

Figure S2. Estradiol-induced vasorelaxation in the presence of eNOS (L-NAME) or COX-2 (NS398) inhibitors.

**Panel (b):** T+D+ group

without inhibition

|           |          |         |
|-----------|----------|---------|
| 0.0000001 | 0.000001 | 0.00001 |
| 9.98      | 15.73    | 24.5    |
| 43.46     | 48.36    | 52.04   |
| 6.76      | 4.2      | 8.05    |
| 6.73      | 7.6      | 20.71   |

Figure S2. Estradiol-induced vasorelaxation in the presence of eNOS (L-NAME) or COX-2 (NS398) inhibitors.

**Panel (c):** T-D- group

without inhibition

|           |          |         |           |          |         |
|-----------|----------|---------|-----------|----------|---------|
| 0.0000001 | 0.000001 | 0.00001 | L-NAME    |          |         |
|           |          |         | 0.0000001 | 0.000001 | 0.00001 |
| 5.66      | 6.73     | 5.99    | 2.13      | -1.87    | -10.3   |
| 3.58      | -3.77    | -12.24  | -0.19     | -3.11    | -8.02   |



|       |       |       |       |        |        |
|-------|-------|-------|-------|--------|--------|
| 6.72  | 2.21  | -2.55 | 0.9   | -0.77  | -1.51  |
| 3.42  | -2.78 | -6.61 | 5.22  | -2.01  | -17.47 |
| 8.67  | 7.43  | 7.56  | 9.83  | 2.58   | -3.05  |
| 18.8  | 18.8  | 8.94  | 0.29  | -13.68 | -18.48 |
| 12.5  | 14.42 | 34.03 | 3.63  | -3.81  | -9.96  |
| 33.72 | 38.4  | 36.84 | 14.59 | 11.77  | 0.67   |
| 16.3  | 24.22 | 38.11 | 5.5   | -12.5  | -38.08 |
| 10.46 | 11.24 | 11.41 | 3.51  | 4.52   | 5.81   |

Figure S2. Estradiol-induced vasorelaxation in the presence of eNOS (L-NAME) or COX-2 (NS398) inhibitors.

**Panel (c):** T-D- group

without inhibition

|           |          |         |
|-----------|----------|---------|
| 0.0000001 | 0.000001 | 0.00001 |
| 6.58      | 6.06     | 5.11    |
| 20.14     | 16.47    | 15.06   |
| 21.18     | 33.33    | 48.63   |
| 28.77     | 28.91    | 50.28   |
| 8.1       | 26.3     | 47.87   |
| 7.85      | -2.7     | -14.71  |
| 23.34     | 36.15    | 40.76   |
| 3.95      | -6.83    | -12.19  |
| 38.26     | 45.4     | 59.54   |

Figure S2. Estradiol-induced vasorelaxation in the presence of eNOS (L-NAME) or COX-2 (NS398) inhibitors.

Panel (d): T+D- group

without inhibition

|           |          |         |
|-----------|----------|---------|
| 0.0000001 | 0.000001 | 0.00001 |
| 16.17     | 19.72    | 19.54   |
| 19.42     | 27.44    | 27.76   |
| 7.28      | 7.65     | 4.63    |
| 22.15     | 25.49    | 48.82   |
| 27.79     | 21.96    | 21.96   |
| 27.98     | 23.46    | 22.7    |
| 4.14      | -3.69    | -11.87  |
| 13.21     | 19.8     | 19.32   |
| 58.3      | 61.8     | 69.5    |
| 36.8      | 35.88    | 35.31   |
| 2.39      | -4.45    | -10.84  |
| 39.37     | 43.71    | 40.83   |
| 20.57     | 16.43    | -0.39   |
| 16.08     | 37.25    | 42.94   |
| 13.2      | 18.35    | 20.36   |
| 15.03     | 36.59    | 42.39   |
| 18.23     | 13.7     | 3.04    |
| 18.6      | 24.01    | 29.94   |

L-NAME

|           |          |         |
|-----------|----------|---------|
| 0.0000001 | 0.000001 | 0.00001 |
| 8.25      | 9.35     | 17.75   |
| 7.11      | 2.09     | -0.51   |
| 21.65     | 34.96    | 37.84   |
| 0.25      | -24.77   | -41.65  |
| 0.04      | -1.99    | -6.3    |
| 34.91     | 41.85    | 44.42   |
| 7.92      | 14.03    | 7.95    |
| 3.31      | -5.84    | -29.77  |
| 2.66      | -13.25   | -30.7   |
| 7.9       | 3.68     | -5.52   |
| -3.34     | -19.77   | -43.47  |

23.63                      32.57                      24.82

**Figure S3. Immunohistochemical changes in thoracic aorta wall.**

Panel (a) ER

Vitamin D supplementation

Control

Testosterone

|          |          |
|----------|----------|
| 0.135409 | 0.14766  |
| 0.162726 | 0.15734  |
| 0.150918 | 0.130959 |
| 0.150428 | 0.152817 |
| 0.141466 | 0.171425 |
|          | 0.206645 |

Vitamin D deficiency

Control

Testosterone

|          |          |
|----------|----------|
| 0.130206 | 0.156888 |
| 0.109438 | 0.151715 |
| 0.105076 | 0.17532  |
| 0.098695 | 0.116862 |
| 0.090132 | 0.153379 |
| 0.061478 | 0.15278  |
|          | 0.042282 |

Figure S3. Immunohistochemical changes in thoracic aorta wall.

Panel (c) eNOS

Vitamin D supplementation

Control

Testosterone

|          |          |
|----------|----------|
| 0.297826 | 0.292462 |
| 0.325377 | 0.063908 |
| 0.218497 | 0.160219 |
| 0.3695   | 0.27844  |
| 0.243554 |          |
| 0.197228 |          |

Vitamin D deficiency

Control

Testosterone

|          |          |
|----------|----------|
| 0.308594 | 0.034581 |
| 0.080823 | 0.048423 |
| 0.088821 | 0.315507 |
| 0.132585 | 0.182961 |

Figure S3. Immunohistochemical changes in thoracic aorta wall.

Panel (e) COX-2

Vitamin D supplementation

| Control  | Testosterone |
|----------|--------------|
| 15.01745 | 20.33375     |
| 11.07665 | 46.53739     |
| 5.382877 | 29.9327      |
| 5.606379 | 76.79092     |
| 11.97878 |              |

Vitamin D deficiency

| Control  | Testosterone |
|----------|--------------|
| 21.98428 | 18.87836     |
| 12.51002 | 28.76419     |
| 29.49834 | 6.53123      |
| 40.534   | 37.06894     |
| 10.92393 |              |

**Figure S2. Estradiol-induced vasorelaxation in the presence of eNOS (L-NAME) or COX-2 (NS398) inhibitors.**

**Panel (a):** T-D+ group

| COX-2 inhibitor |          |         |
|-----------------|----------|---------|
| 0.0000001       | 0.000001 | 0.00001 |
| 17.38           | 25.31    | 28.72   |
| 5.63            | 10.04    | -7.6    |
| 11.52           | 7.37     | 10.83   |
| 19.5            | 24       | 18      |
| 49.4            | 24.1     | -6.02   |
| 20.83           | 29.52    | 53.44   |
| 8.26            | 9.09     | -3.58   |
| 14.35           | 37.31    | 29.96   |
| 5.10            | 11.86    | 2.77    |

**Figure S2. Estradiol-induced vasorelaxation in the presence of eNOS (L-NAME) or COX-2 (NS398) inhibitors.**

**Panel (b):** T+D+ group

| COX-2 inhibitor |          |         |
|-----------------|----------|---------|
| 0.0000001       | 0.000001 | 0.00001 |
| 16.58           | 19.17    | 19.89   |
| 23.43           | 43.51    | 55.37   |
| 13.52           | 18.51    | 12.99   |

|       |       |       |
|-------|-------|-------|
| 6.02  | 17.78 | 50.59 |
| 2.47  | 2.47  | 2.04  |
| 39.83 | 44.82 | 60.11 |

Figure S2. Estradiol-induced vasorelaxation in the presence of eNOS (L-NAME) or COX-2 (NS398) inhibitors.

**Panel (c):** T-D- group

|                 |          |         |
|-----------------|----------|---------|
| COX-2 inhibitor |          |         |
| 0.0000001       | 0.000001 | 0.00001 |
| 6.54            | 6.6      | 15.32   |
| -1              | -4.88    | -2.53   |

|       |       |        |
|-------|-------|--------|
| 17.81 | 12.1  | -1.3   |
| -2.25 | 7.31  | -8.48  |
| 3.88  | 1.35  | -9.03  |
| 1.32  | -9.04 | -16.93 |
| 13.74 | 10.26 | 9.74   |
| 5.42  | -2.68 | -15.19 |
| 10.78 | 6.54  | -5.61  |
| 3.1   | -3.91 | -5.39  |



Figure S2. Estradiol-induced vasorelaxation in the presence of eNOS (L-NAME) or COX-2 (NS398) inhibitors.

Panel (d): T+D- group

COX-2 inhibitor

|           |          |         |
|-----------|----------|---------|
| 0.0000001 | 0.000001 | 0.00001 |
| 18.15     | 12.85    | 9.96    |
| 13.83     | -27.88   | -60.71  |
| 8.92      | 1.3      | 30.93   |
| 49.49     | 52.51    | 69.33   |
| 12.46     | 8.79     | -1.58   |
| 9.69      | 3.07     | -7.66   |
| 1.23      | -11.58   | -26.2   |
| 8.1       | 8.71     | -20.81  |
| 17.39     | -10.13   | -36.9   |
